# Supplementary material
Source: publisher figshare collection journal article supplement (https://asha.figshare.com/articles/dataset/_/13105442)
Supplement: Supplementary file 1 [file 1]

**Supplemental Material S3.** Twelve Chinese disyllabic words used for the imitation task.

| Word             | Target          | Trained | IPA                    | Meaning      |
|------------------|-----------------|---------|------------------------|--------------|
| <i>pá shǒu</i>   | p <sup>h</sup>  | No      | p <sup>h</sup> a xou   | thief        |
| <i>bá shǒu</i>   | p               | No      | pa xou                 | handle       |
| <i>tào lù</i>    | t <sup>h</sup>  | No      | t <sup>h</sup> au lu   | strategy     |
| <i>dào lù</i>    | t               | No      | tau lu                 | road         |
| <i>kǒu liáng</i> | k <sup>h</sup>  | Yes     | k <sup>h</sup> ou lian | ration       |
| <i>gǒu liáng</i> | k               | Yes     | kou lian               | dog food     |
| <i>cōng yóu</i>  | ts <sup>h</sup> | No      | ts <sup>h</sup> un jou | scallion oil |
| <i>zōng yóu</i>  | ts              | No      | tsun jou               | palm oil     |
| <i>qīng lǐ</i>   | te <sup>h</sup> | Yes     | te <sup>h</sup> in li  | to clean     |
| <i>jīng lǐ</i>   | te              | Yes     | tein li                | manager      |
| <i>chù lì</i>    | tɕ <sup>h</sup> | Yes     | tɕ <sup>h</sup> u li   | to stand     |
| <i>zhù lì</i>    | tɕ              | Yes     | tɕu li                 | boosting     |
