# Supplementary material
Source: publisher figshare collection journal article supplement (https://asha.figshare.com/articles/dataset/_/13105442)
Supplement: Supplementary file 2 [file 1]

**Supplemental Material S1.** Twelve Chinese disyllabic words used for the training session.

| Word             | Target          | Consonant type | Catalan adaptation           | IPA                   | Meaning       |
|------------------|-----------------|----------------|------------------------------|-----------------------|---------------|
| <i>pí yán</i>    | p <sup>h</sup>  | plosive        | <i>p<sup>hi</sup> yan</i>    | p <sup>hi</sup> jan   | dermatitis    |
| <i>bí yán</i>    | p               | plosive        | <i>pi yan</i>                | pi jan                | rhinitis      |
| <i>tān liàn</i>  | t <sup>h</sup>  | plosive        | <i>t<sup>han</sup> lian</i>  | t <sup>han</sup> lian | greed         |
| <i>dān liàn</i>  | t               | plosive        | <i>tan lian</i>              | tan lian              | one-side love |
| <i>kǒu liáng</i> | k <sup>h</sup>  | plosive        | <i>k<sup>hou</sup> liang</i> | k <sup>hou</sup> lian | ration        |
| <i>gǒu liáng</i> | k               | plosive        | <i>kou liang</i>             | kou lian              | dog food      |
| <i>cuò wù</i>    | ts <sup>h</sup> | affricate      | <i>ts<sup>huo</sup> u</i>    | ts <sup>huo</sup> u   | error         |
| <i>zuò wù</i>    | ts              | affricate      | <i>tsuo u</i>                | tsuo u                | crop          |
| <i>qīng lǐ</i>   | tɕ <sup>h</sup> | affricate      | <i>ts<sup>hing</sup> li</i>  | tɕ <sup>hiŋ</sup> li  | to clean      |
| <i>jīng lǐ</i>   | tɕ              | affricate      | <i>tsjing li</i>             | teiŋ li               | manager       |
| <i>chù lì</i>    | tɕ <sup>h</sup> | affricate      | <i>tx<sup>hu</sup> li</i>    | tɕ <sup>hu</sup> li   | to stand      |
| <i>zhù lì</i>    | tɕ              | affricate      | <i>txu li</i>                | tɕsu li               | boosting      |

*Note.* In the “Word” column, all items are written in *pinyin* (standard Romanized Chinese). The IPA were transcribed based on Xiandai Hanyu [Modern Chinese], which is edited by Huang, B., and Liao, X. (2002).
