# Supplementary material
Source: publisher figshare collection journal article supplement (https://asha.figshare.com/articles/dataset/_/13105442)
Supplement: Supplementary file 3 [file 1]

**Supplemental Material S2.** Twelve Chinese disyllabic words used for the identification task.

| Word            | Target          | Trained | Catalan adaptation          | IPA                   | Meaning          |
|-----------------|-----------------|---------|-----------------------------|-----------------------|------------------|
| <i>pí yán</i>   | p <sup>h</sup>  | Yes     | <i>p<sup>hi</sup> yan</i>   | p <sup>hi</sup> jan   | dermatitis       |
| <i>bí yán</i>   | p               | Yes     | <i>pi yan</i>               | pi jan                | rhinitis         |
| <i>tān liàn</i> | t <sup>h</sup>  | Yes     | <i>t<sup>han</sup> lian</i> | t <sup>han</sup> lian | greed            |
| <i>dān liàn</i> | t               | Yes     | <i>tan lian</i>             | tan lian              | one-side love    |
| <i>kǔ lì</i>    | k <sup>h</sup>  | No      | <i>k<sup>hu</sup> li</i>    | k <sup>hu</sup> li    | labor            |
| <i>gǔ lì</i>    | k               | No      | <i>ku li</i>                | ku li                 | encouragement    |
| <i>cuò wù</i>   | ts <sup>h</sup> | Yes     | <i>ts<sup>huo</sup> u</i>   | ts <sup>huo</sup> u   | error            |
| <i>zuò wù</i>   | ts              | Yes     | <i>tsuo u</i>               | tsuo u                | crop             |
| <i>qié hé</i>   | tɕ <sup>h</sup> | No      | <i>tsj<sup>he</sup> he</i>  | tɕ <sup>hiɛ</sup> xɤ  | stuffed eggplant |
| <i>jié hé</i>   | tɕ              | No      | <i>tsje he</i>              | tɕiɛ xɤ               | tuberculosis     |
| <i>chǎn shì</i> | tɕ <sup>h</sup> | No      | <i>tx<sup>han</sup> xi</i>  | tɕ <sup>han</sup> ɕɿ  | to elucidate     |
| <i>zhǎn shì</i> | tɕ              | No      | <i>txan xi</i>              | tɕan ɕɿ               | to demonstrate   |
