# Supplementary material
Source: publisher figshare collection journal article supplement (https://asha.figshare.com/articles/dataset/_/13105442)

**Supplemental Material S5.** Screenshots of one trial of the second training block in No Gesture (NG) condition (upper panel) and Gesture (G) condition (lower panel).

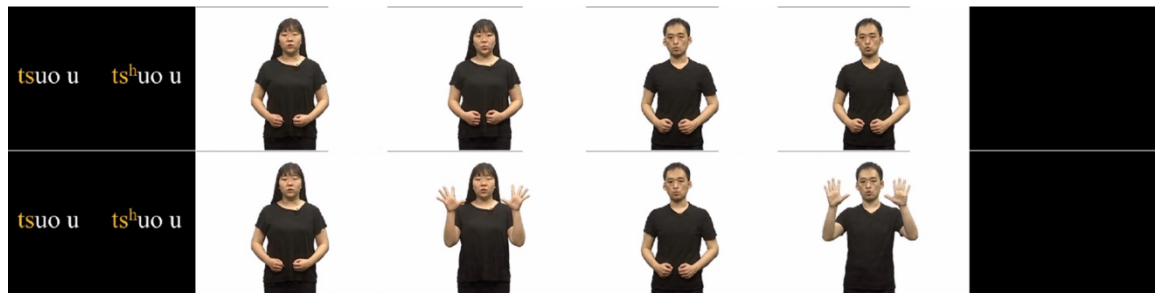

Supplement: Supplementary file 5 [file 1]
